# Supplementary material
Source: MDPI journal article supplement (https://www.mdpi.com/2673-8007/4/2/52)
Supplement: s1 [file s1]

Archive with 1 entries (1 files):
- applmicrobiol-2940890-supplementary.pdf
