# Supplementary material
Source: MDPI journal article supplement (https://www.mdpi.com/2673-8007/4/2/52)
Supplement: s1 [file s1 › applmicrobiol-2940890-supplementary.pdf]

## Supplementary Materials

**Table S1.** Macro and micro morphological characters of the fungal isolates purified from *Peperomia argyreia* in PDA after 10 d cultivation in darkness at 25° C.

|    | Macromorphology                                                                     |             |         | Micromorphology (100X, cotton blue)                                                  |                                                                     |
|----|-------------------------------------------------------------------------------------|-------------|---------|--------------------------------------------------------------------------------------|---------------------------------------------------------------------|
|    | 10 d APD (front)                                                                    | Development | Texture |                                                                                      |                                                                     |
| P1 | 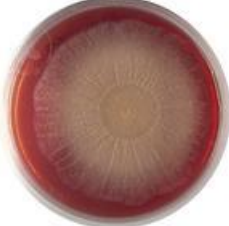   | Abundant    | Velvety | 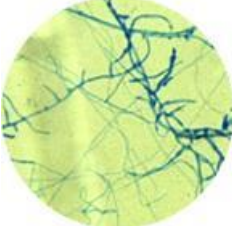   | Dark septate<br>hiphae                                              |
| P2 | 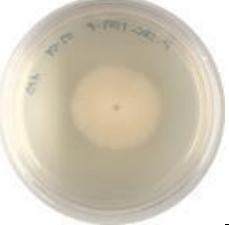  | Regular     | Plushy  | 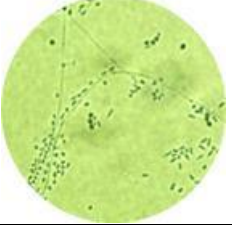  | Hialine septate<br>hiphae,<br>conidia                               |
| P3 | 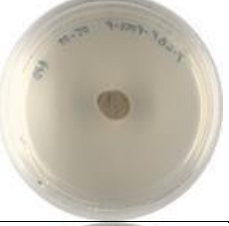 | Regular     | Velvety | 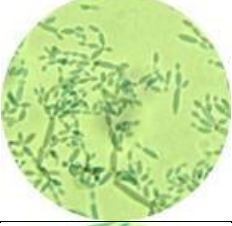 | Dark septate<br>hiphae,<br>conidia in<br>conidiophores              |
| P4 | 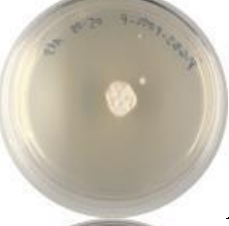 | Scarce      | Plushy  | 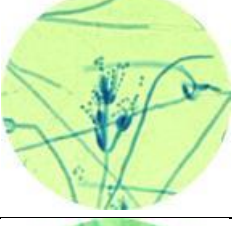 | Hialine septate<br>mycelia,<br>phialides with<br>conidia in<br>rows |
| P5 | 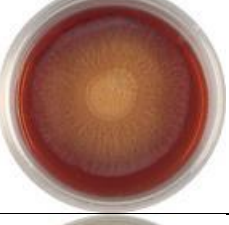 | Abundant    | Velvety | 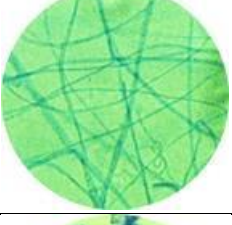 | Dark septate<br>mycelia                                             |
| P6 | 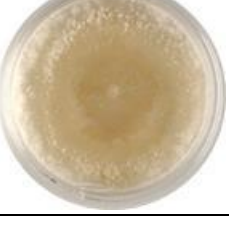 | Abundant    | Plushy  | 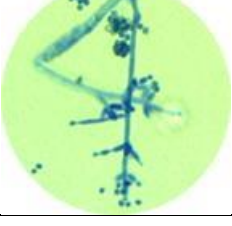 | Hialine septate<br>mycelia,<br>phialides with<br>conidia            |

|            |                                                                                     |          |        |                                                                                      |                                                 |
|------------|-------------------------------------------------------------------------------------|----------|--------|--------------------------------------------------------------------------------------|-------------------------------------------------|
| <b>P7</b>  | 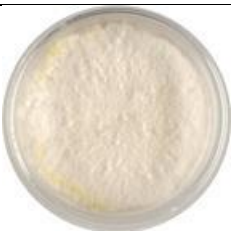   | Abundant | Plushy | 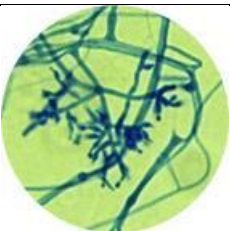   | Hialine septate mycelia, phialides with conidia |
| <b>P8</b>  | 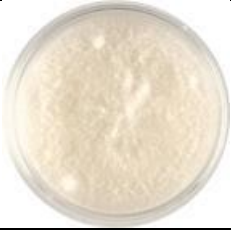   | Abundant | Plushy | 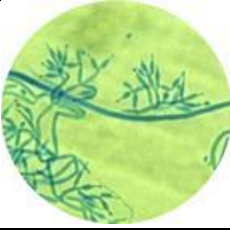   | Hialine septate mycelia, phialides with conidia |
| <b>P9</b>  | 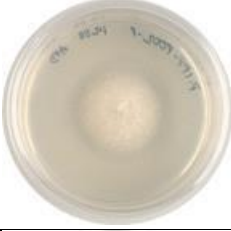   | Regular  | Plushy | 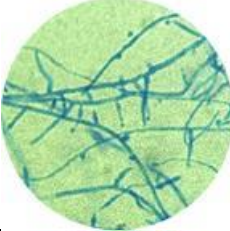   | Hialine septate mycelia, phialides with conidia |
| <b>P10</b> | 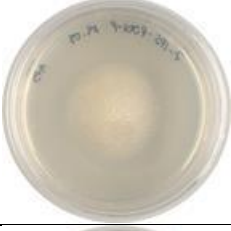  | Regular  | Plushy | 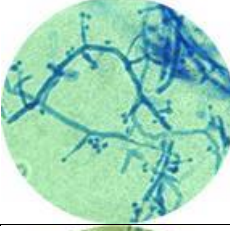  | Hialine septate mycelia, phialides with conidia |
| <b>P11</b> | 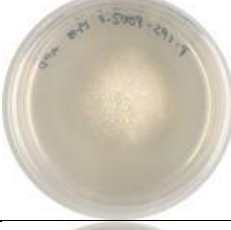 | Regular  | Plushy | 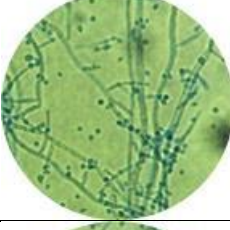 | Hialine septate mycelia, phialides with conidia |
| <b>P12</b> | 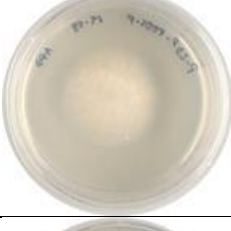 | Regular  | Plushy | 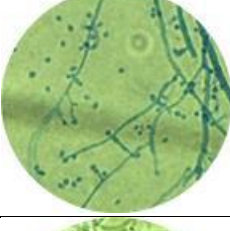 | Hialine septate mycelia, phialides with conidia |
| <b>P13</b> | 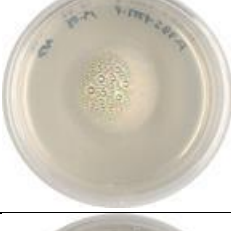 | Regular  | Plushy | 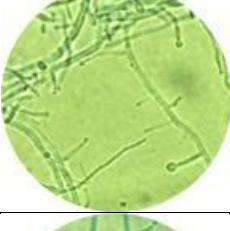 | Hialine septate mycelia, phialides with conidia |
| <b>P14</b> | 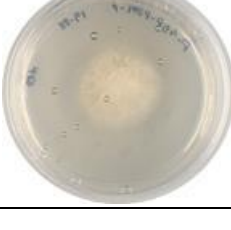 | Regular  | Plushy | 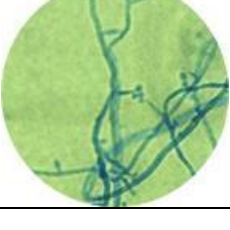 | Hialine septate mycelia, phialides with conidia |

|            |                                                                                     |          |        |                                                                                      |                                                 |
|------------|-------------------------------------------------------------------------------------|----------|--------|--------------------------------------------------------------------------------------|-------------------------------------------------|
| <b>P15</b> | 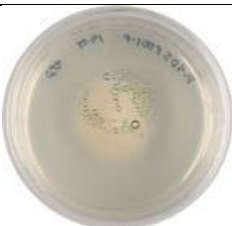   | Regular  | Plushy | 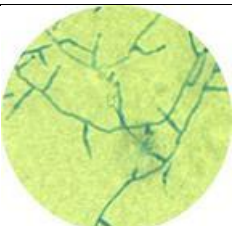   | Hialine septate mycelia, phialides with conidia |
| <b>P16</b> | 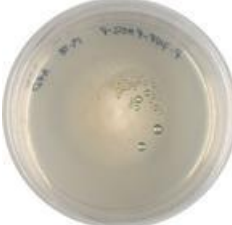   | Regular  | Plushy | 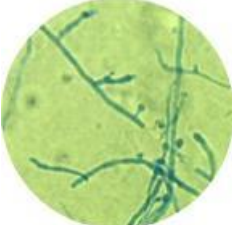   | Hialine septate mycelia, phialides with conidia |
| <b>P17</b> | 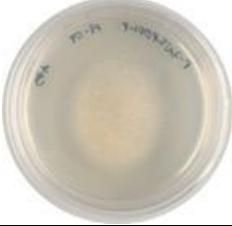   | Regular  | Plushy | 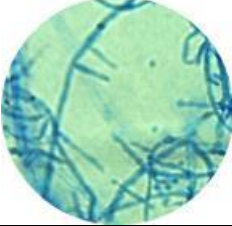   | Hialine septate mycelia, phialides with conidia |
| <b>P18</b> | 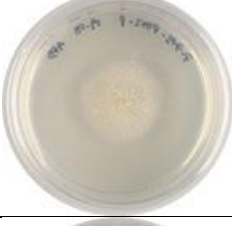  | Regular  | Plushy | 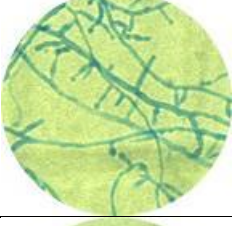  | Hialine septate mycelia, phialides with conidia |
| <b>P19</b> | 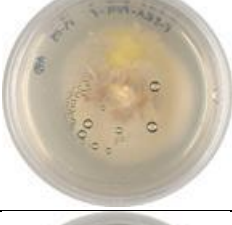 | Abundant | Plushy | 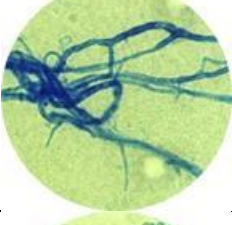 | Hialine septate mycelia                         |
| <b>P20</b> | 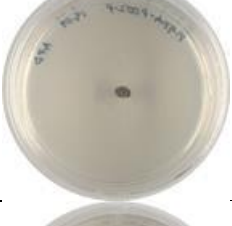 | Scarce   | Crusty | 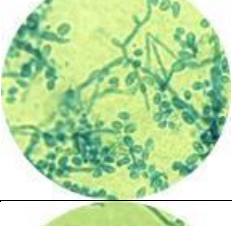 | Dark septate mycelia with conidia               |
| <b>P21</b> | 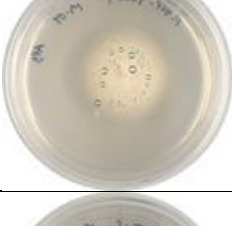 | Regular  | Plushy | 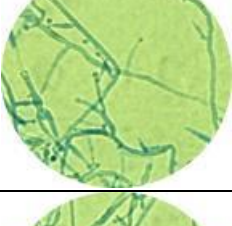 | Hialine septate mycelia, phialides with conidia |
| <b>P22</b> | 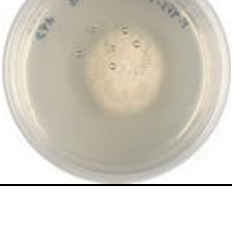 | Regular  | Plushy | 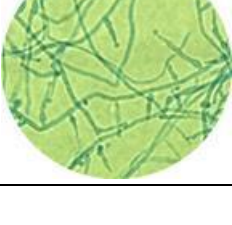 | Hialine septate mycelia, phialides with conidia |

|            |                                                                                     |          |        |                                                                                      |                                                 |
|------------|-------------------------------------------------------------------------------------|----------|--------|--------------------------------------------------------------------------------------|-------------------------------------------------|
| <b>P23</b> | 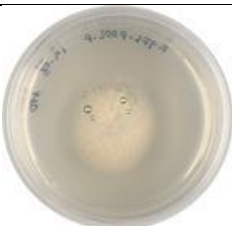   | Regular  | Plushy | 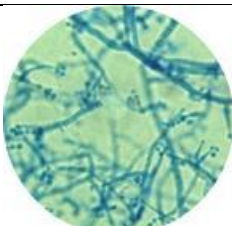   | Hialine septate mycelia, phialides with conidia |
| <b>P24</b> | 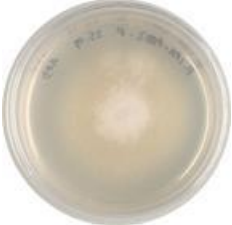   | Abundant | Plushy | 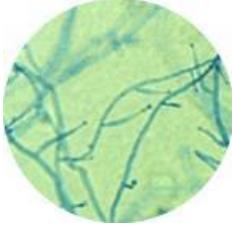   | Hialine septate mycelia, phialides with conidia |
| <b>P25</b> | 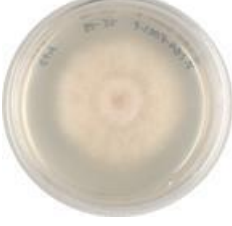   | Abundant | Plushy | 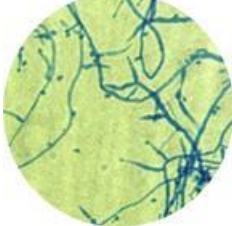   | Hialine septate mycelia, phialides with conidia |
| <b>P26</b> | 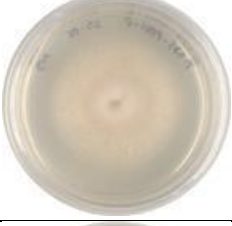  | Abundant | Plushy | 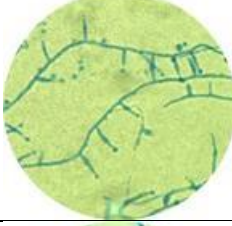  | Hialine septate mycelia, phialides with conidia |
| <b>P27</b> | 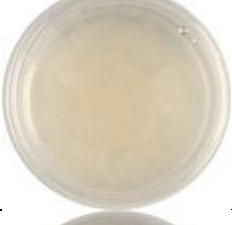 | Abundant | Plushy | 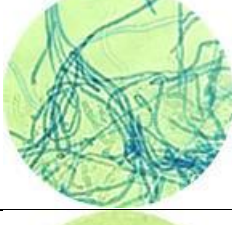 | Hialine septate mycelia                         |
| <b>P28</b> | 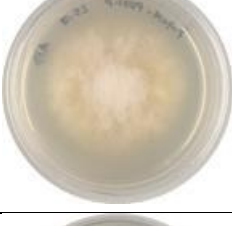 | Abundant | Plushy | 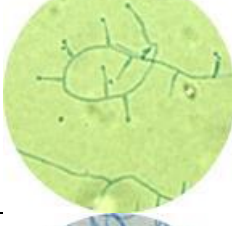 | Hialine septate mycelia, phialides with conidia |
| <b>P29</b> | 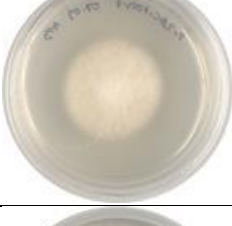 | Regular  | Plushy | 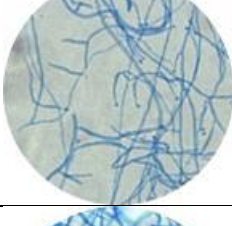 | Hialine septate mycelia, phialides with conidia |
| <b>P30</b> | 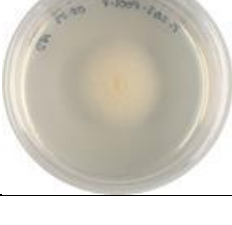 | Regular  | Plushy | 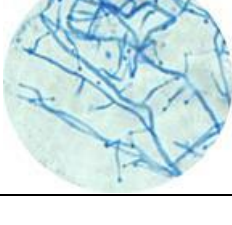 | Hialine septate mycelia, phialides with conidia |

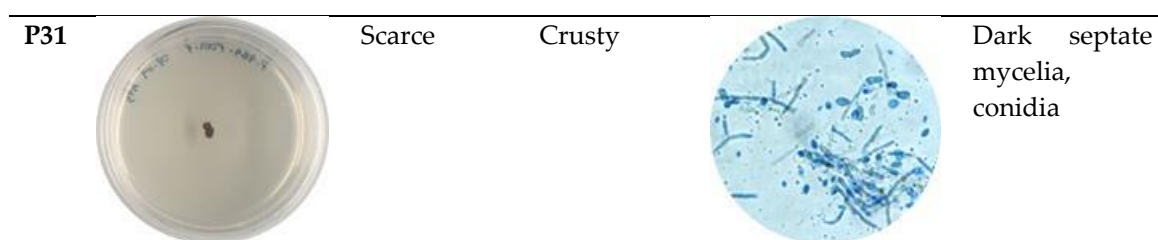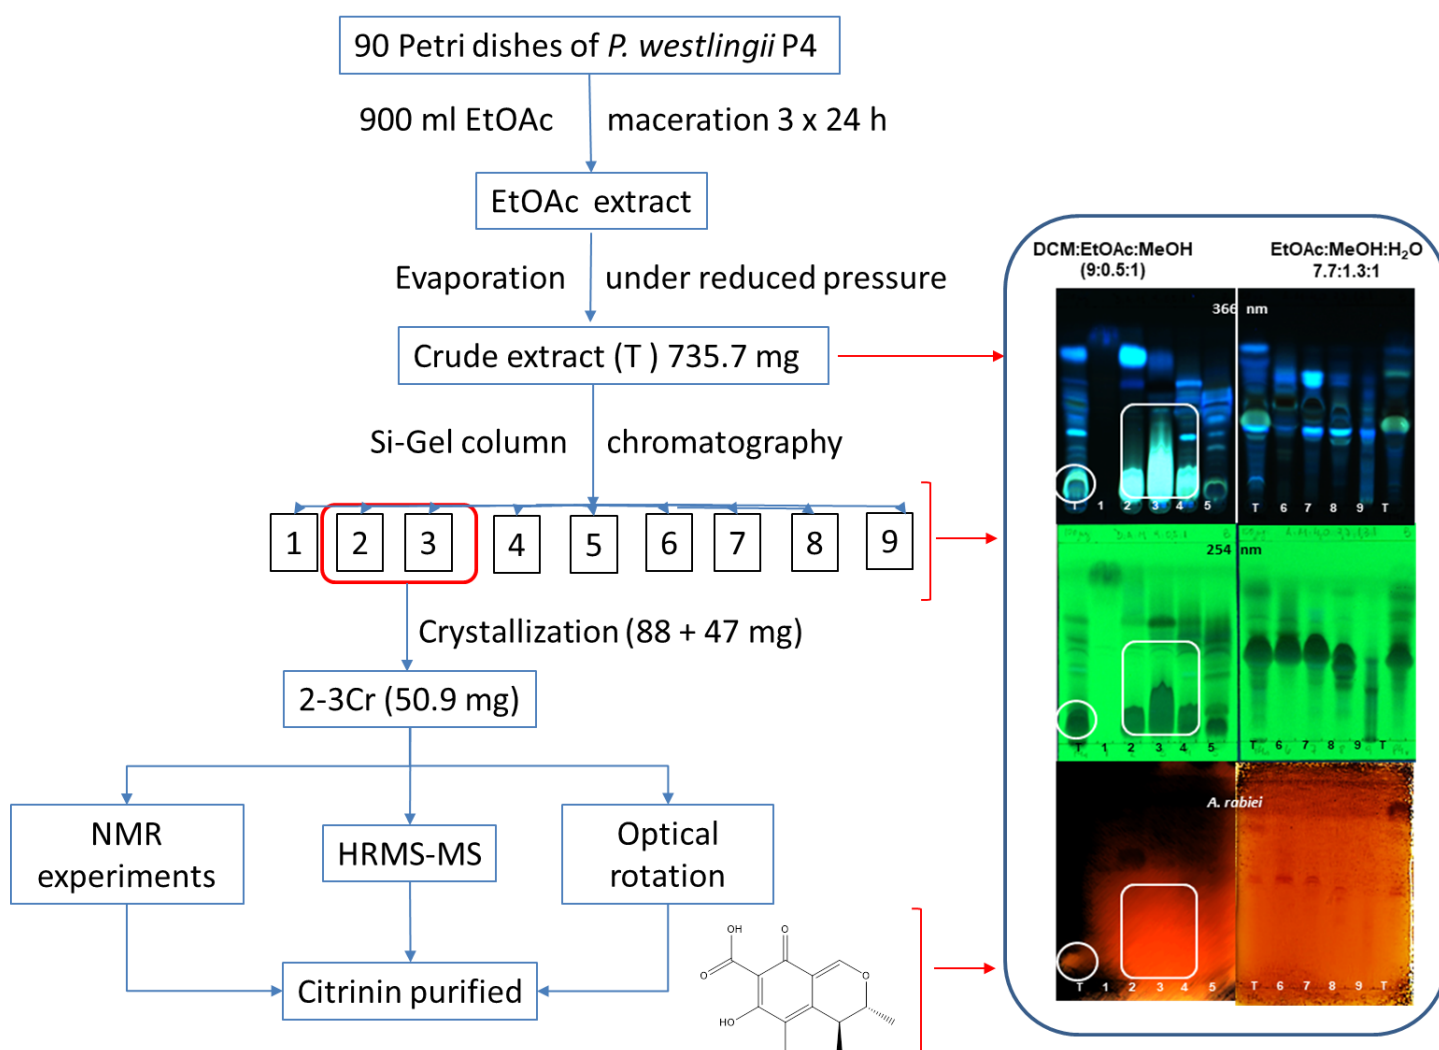

**Figure S1.** Purification scheme of citrinin from the EtOAc of *P. westlingii* P4. Bioassay fractionation with *A. rabiei* AR2. Bioassay fractionation was conducted using *A. rabiei* AR2. Fractions 2 and 3 (red box) obtained from the Si-gel chromatography of the EtOAc crude extract shown antifungal activity in the bioautography assay (white box) and were further purified by crystallization, resulting in the isolation of citrinin, which was identified as the active compound responsible for the activity found (white circle).

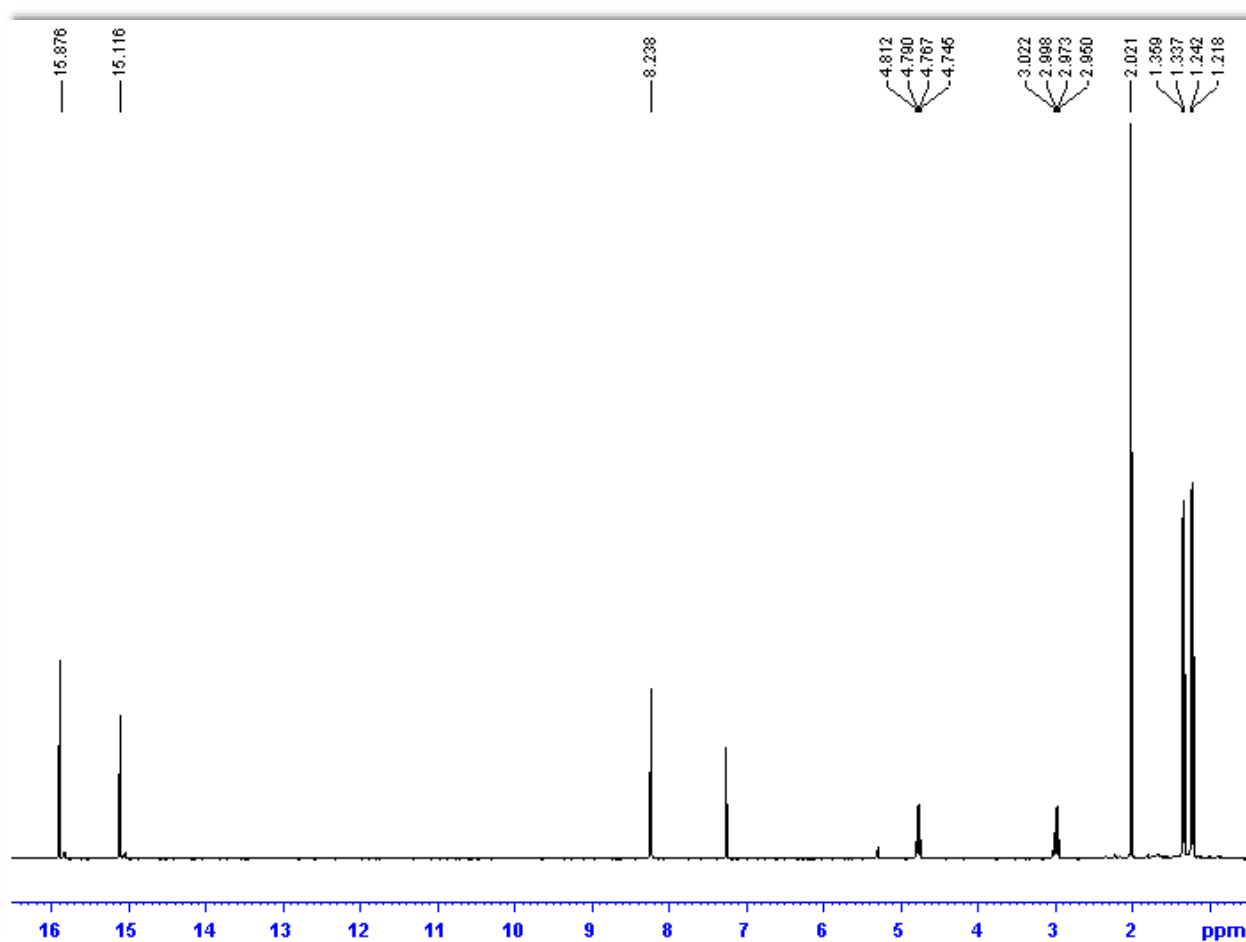

**Figure S2.** <sup>1</sup>H NMR spectrum of citrinin in CDCl<sub>3</sub>, 300 MHz.

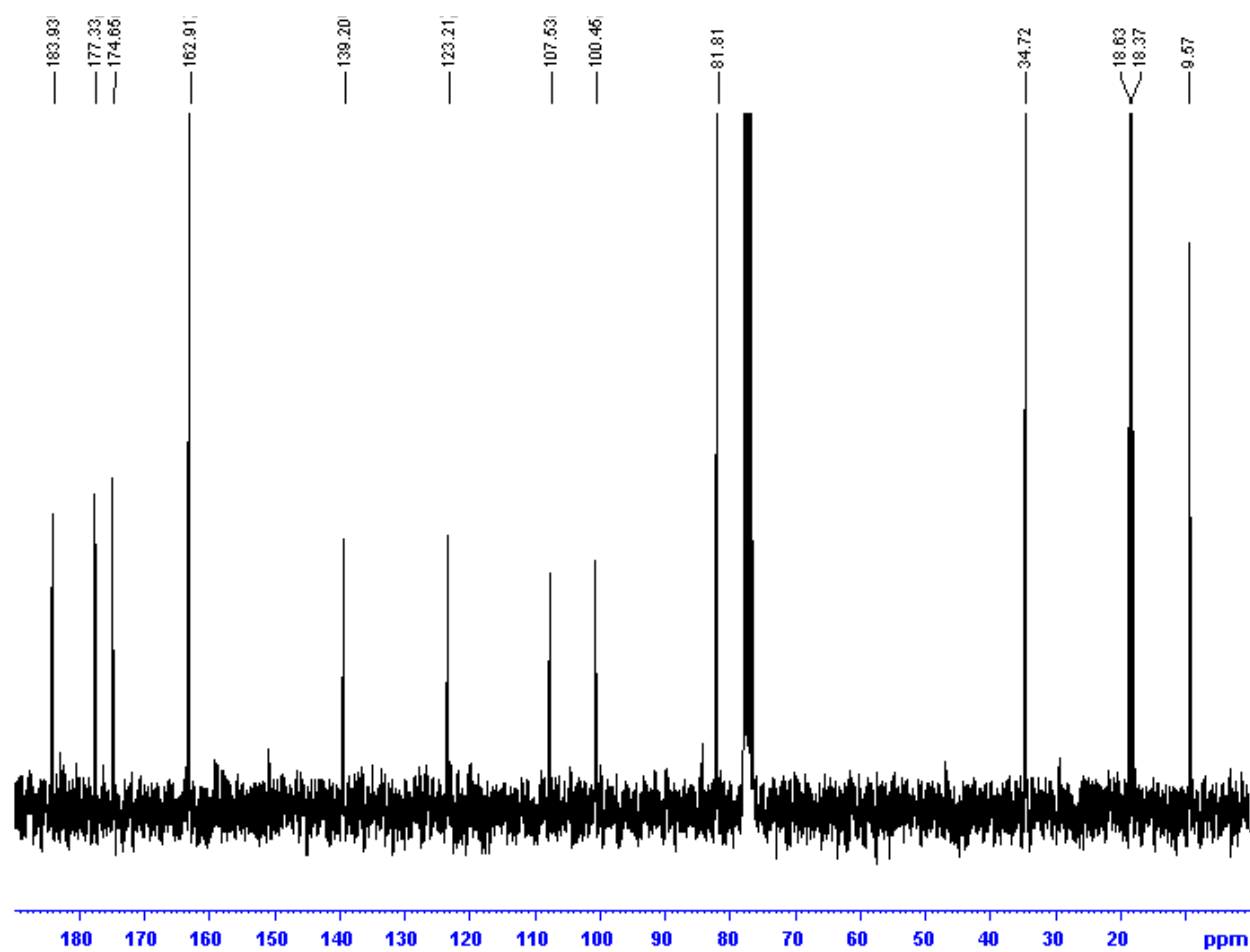

Figure S3.  $^{13}\text{C}$  NMR spectrum of citrinin in  $\text{CDCl}_3$ , 75 MHz.

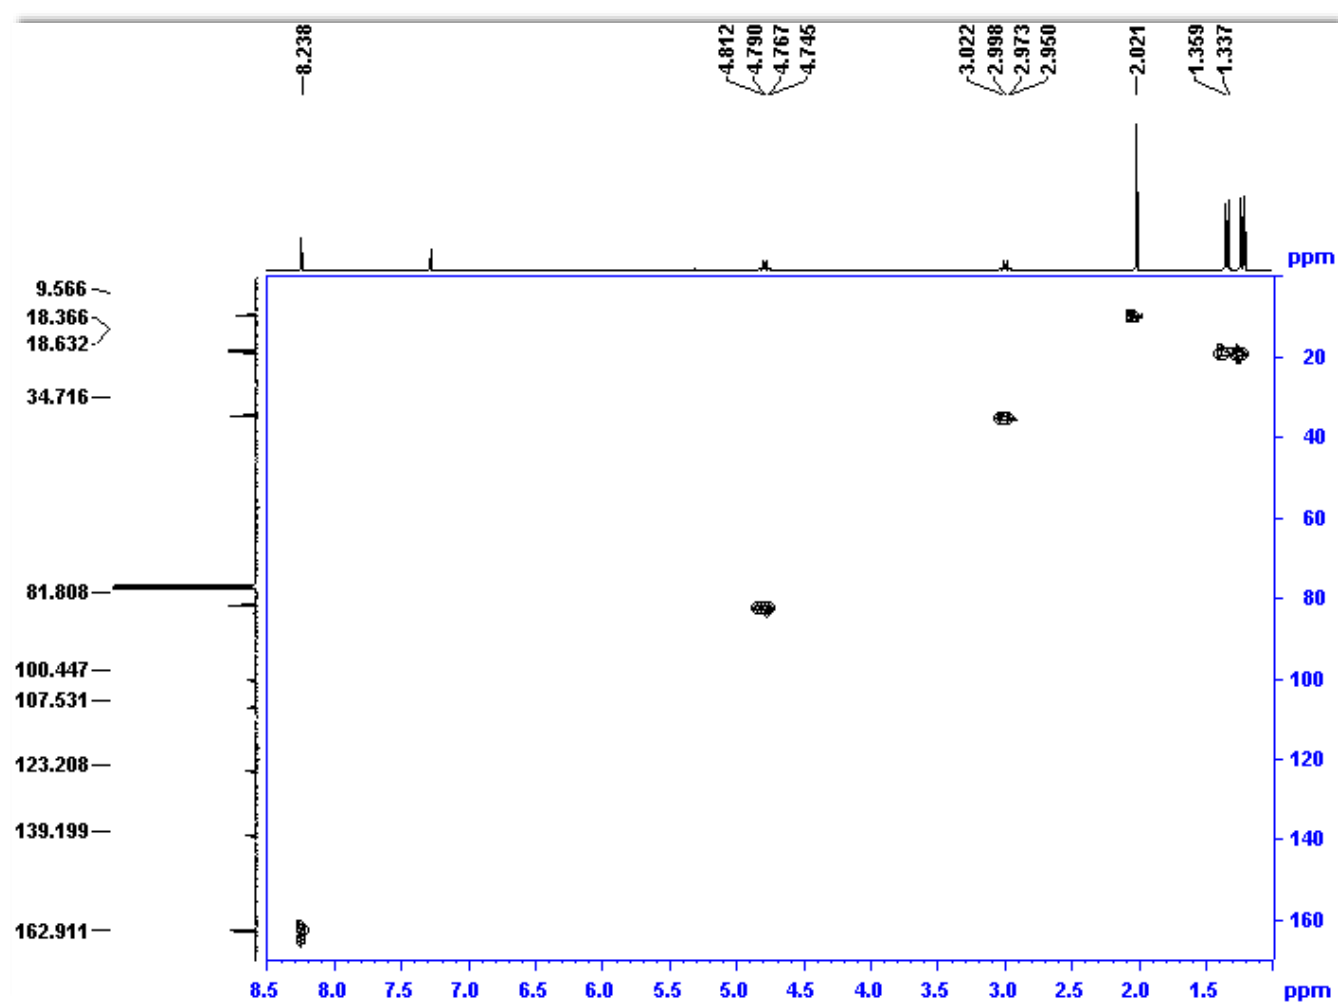

Figure S4. HSQC experiment of citrinin.

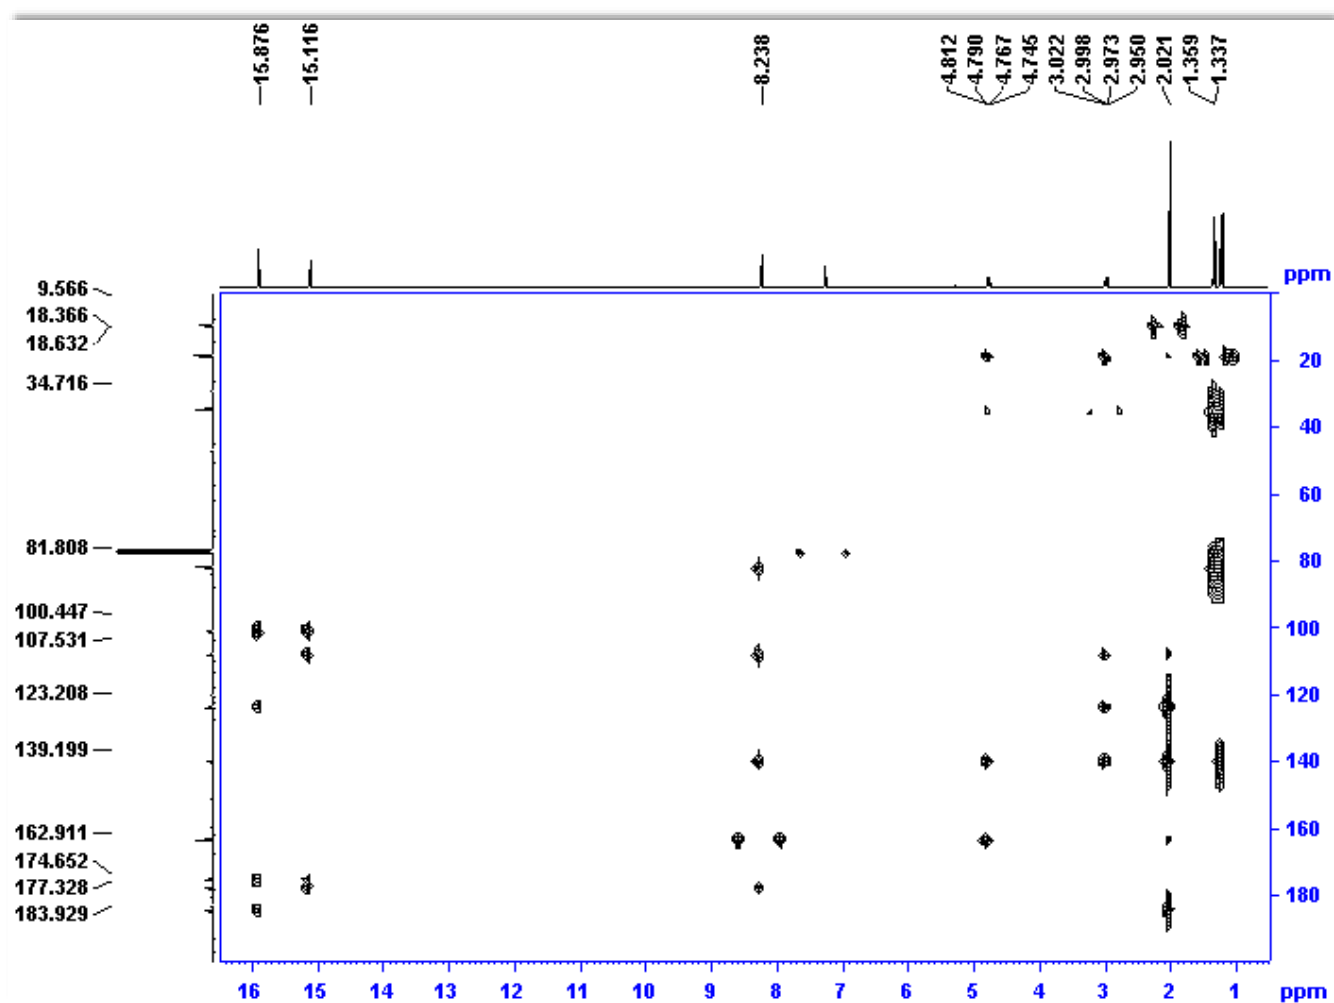

Figure S5. HMBC experiment of citrinin.

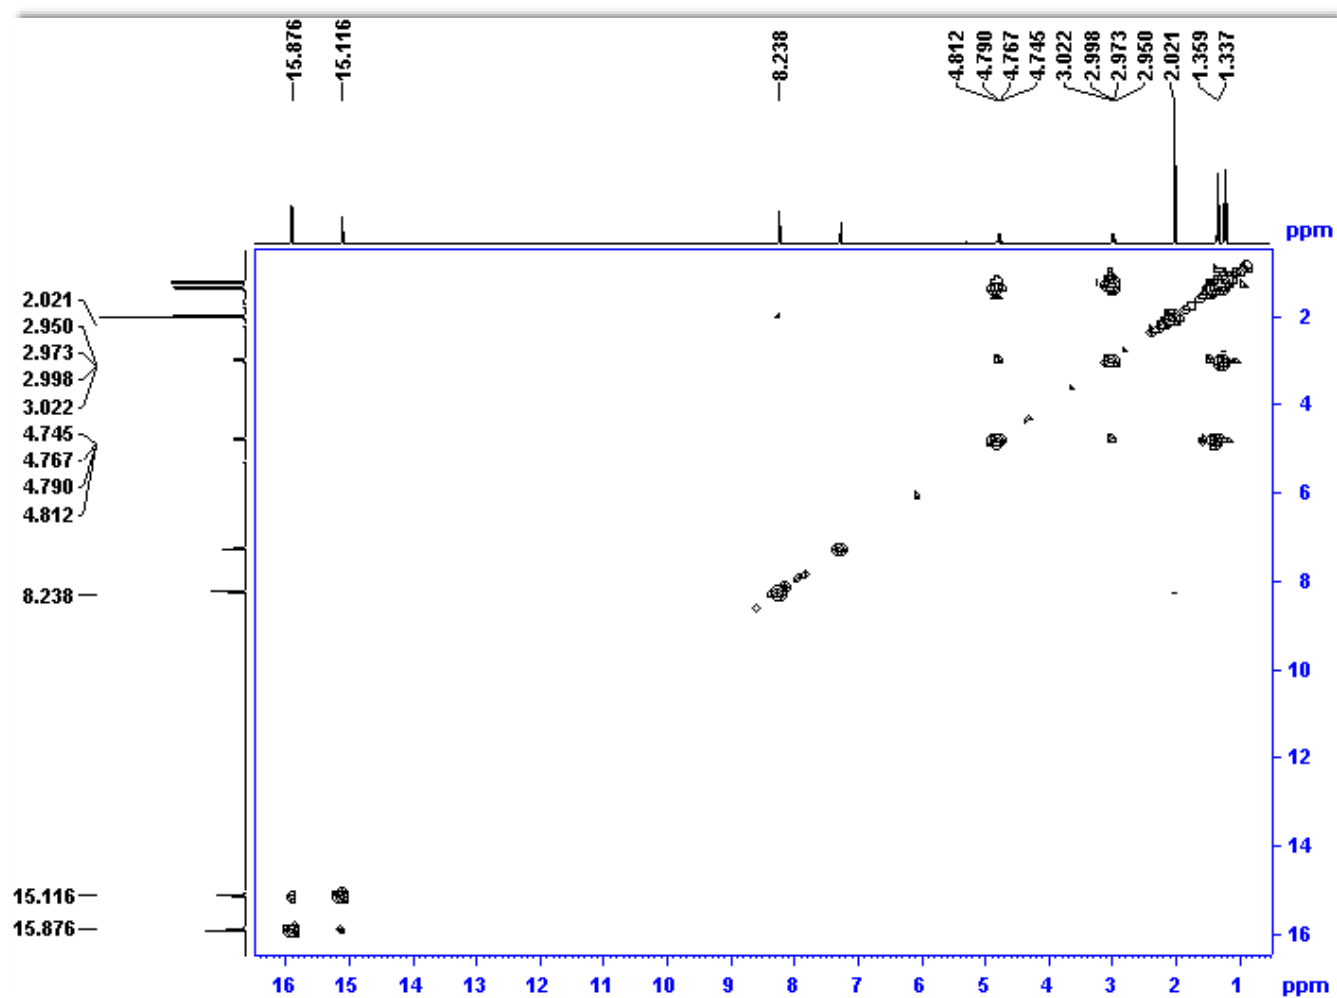

Figure S6. HH COSY citrinin in CDCl<sub>3</sub>, 300 MHz..

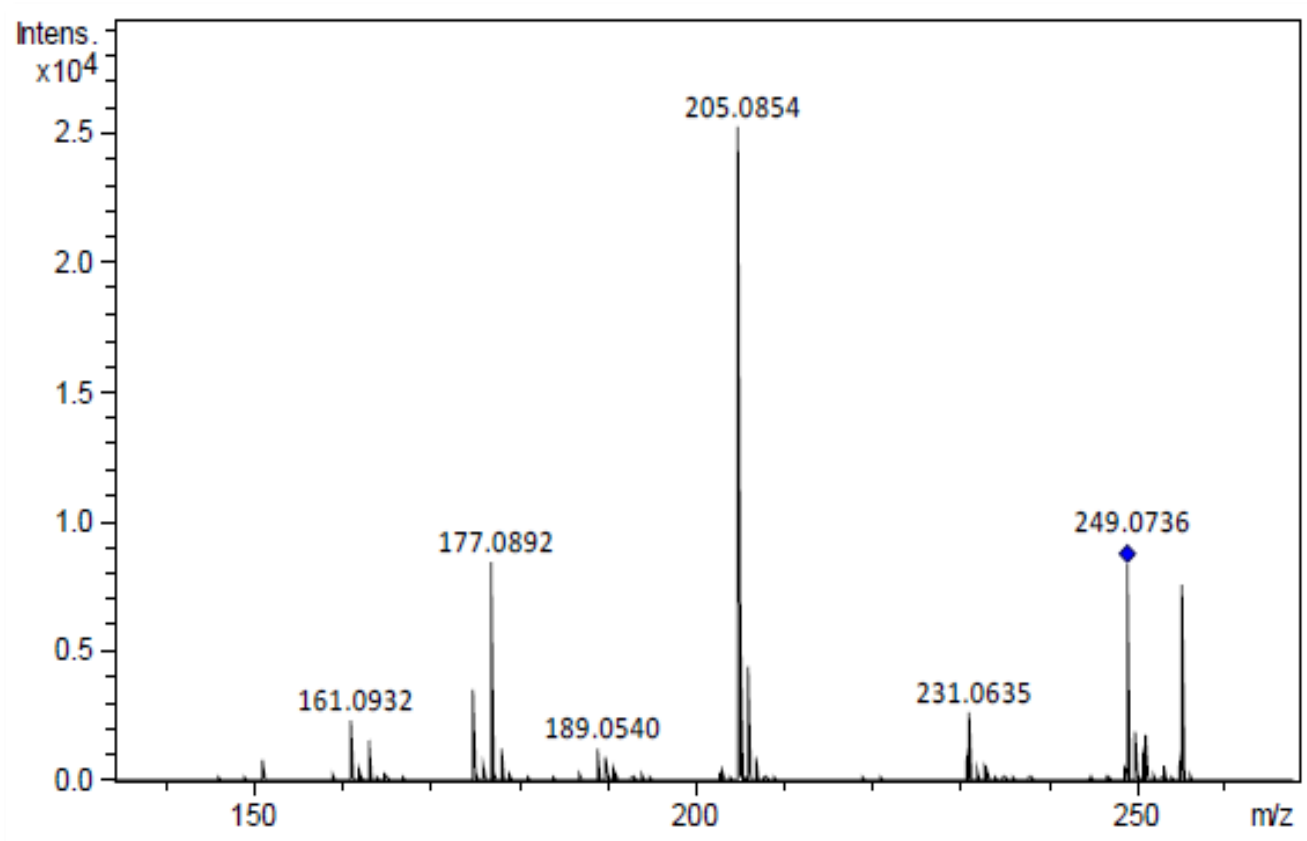

**Figure S7.** HRMS-MS<sup>2</sup> of citrinin in negative mode. The fragmentation of the ion  $[M-H]^- = 249.0752$  is observed. Collision energy = 10 eV.
